# Supplementary material for: Genome-wide DNA methylation analysis pre- and post-lenalidomide treatment in patients with myelodysplastic syndrome with isolated deletion (5q)
Source: Springer Nature journal article supplement (doi:10.1007/s00277-021-04492-1), 2021-04-27
Supplement: MOESM1 [file 19110088]

1 **Supplemental Material for Manuscript “Genome-wide DNA methylation analysis**  
2 **pre- and post-lenalidomide treatment in patients with myelodysplastic syndrome**  
3 **with isolated deletion (5q): results from a prospective multicenter study of the**  
4 **German MDS study group”, Annals of Hematology**

5 Anna Hecht<sup>1</sup>, Julia A. Meyer<sup>2</sup>, Johann-Christoph Jann<sup>1</sup>, Katja Sockel<sup>3</sup>, Aristoteles Giagounidis<sup>4</sup>,  
6 Katharina S. Götze<sup>5</sup>, Anne Letsch<sup>6</sup>, Detlef Haase<sup>7</sup>, Richard F. Schlenk<sup>8</sup>, Torsten Haferlach<sup>9</sup>,  
7 Philippe Schafhausen<sup>10</sup>, Gesine Bug<sup>11</sup>, Michael Lübbert<sup>12</sup>, Felicitas Thol<sup>13</sup>, Guntram Büsche<sup>14</sup>,  
8 Esther Schuler<sup>15</sup>, Verena Nowak<sup>1</sup>, Julia Obländer<sup>1</sup>, Stephanie Fey<sup>1</sup>, Nadine Müller<sup>1</sup>, Georgia  
9 Metzgeroth<sup>1</sup>, Wolf-Karsten Hofmann<sup>1</sup>, Ulrich Germing<sup>15</sup>, Florian Nolte<sup>1</sup>, Mark Reinwald<sup>16</sup> and  
10 Daniel Nowak<sup>1</sup>.

11  
12 <sup>1</sup>Department of Hematology and Oncology, University Hospital Mannheim, Mannheim,  
13 Germany; <sup>2</sup>Department of Pediatrics, University of California San Francisco, San Francisco,  
14 USA; <sup>3</sup>Department of Hematology, University Hospital Dresden, Dresden, Germany;  
15 <sup>4</sup>Department of Hematology, Oncology and Palliative Care, Marien Hospital Duesseldorf,  
16 Duesseldorf, Germany; <sup>5</sup>Department of Internal Medicine, Technical University of Munich,  
17 Munich, Germany; <sup>6</sup>Department of Hematology and Oncology, Charité, Benjamin Franklin  
18 University, Berlin, Germany; <sup>7</sup>University Medicine Goettingen, Clinics of Hematology and  
19 Medical Oncology, Goettingen, Germany; <sup>8</sup>Department of Internal Medicine V, Heidelberg  
20 University Hospital, Germany; <sup>9</sup>MLL Munich Leukemia Laboratory, Munich, Germany;  
21 <sup>10</sup>Department of Oncology, Hematology, BMT with section Pneumology, Hubertus Wald Cancer  
22 Center, University Medical Center Hamburg-Eppendorf, Hamburg, Germany; <sup>11</sup>Department of  
23 Internal Medicine, University Hospital Frankfurt, Frankfurt, Germany; <sup>12</sup>University Hospital  
24 Freiburg, Internal Medicine, Freiburg, Germany; <sup>13</sup>Department of Hematology, Hemostasis,  
25 Oncology, and Stem Cell Transplantation, Hannover Medical School, Hannover, Germany;  
26 <sup>14</sup>Hannover Medical School, Institute of Pathology, Hannover, Germany; <sup>15</sup>Department for  
27 Hematology, Oncology and Clinical Immunology, University Hospital, Heinrich-Heine-University,  
28 Duesseldorf, Germany; <sup>16</sup>Brandenburg Medical School Theodor Fontane, Brandenburg an der  
29 Havel, Germany.

30  
31 **Corresponding author:** Anna Hecht, MD, E-Mail: [anna.hecht@medma.uni-heidelberg.de](mailto:anna.hecht@medma.uni-heidelberg.de)  
32

33 **Supplemental Figure 1:** Overall survival of the 51 patients depending on gender  
34 estimated using the Kaplan-Meier method.

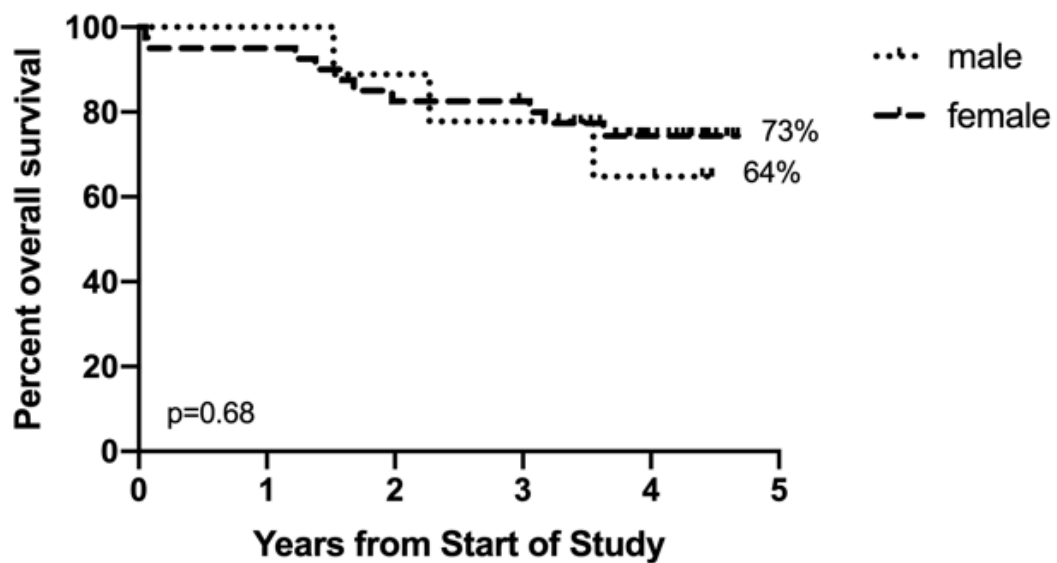

44

45

46

47

48

49

50

51 **Supplemental Figure 2:** Unsupervised clustering of 44 patient bone marrow samples  
 52 prior to lenalidomide treatment. Patients with mutations in TP53 were excluded from  
 53 analysis. After exclusion of TP53mut patients, each of the TP53wt patients still clusters  
 54 in the same way as before when analyzing the whole cohort. Patients are displayed on  
 55 the X axis and the 1534 most variable CpG sites are displayed on the Y axis.  
 56 Information on transfusion independence, cytogenetic remission and death is shown at  
 57 the top of the figure.

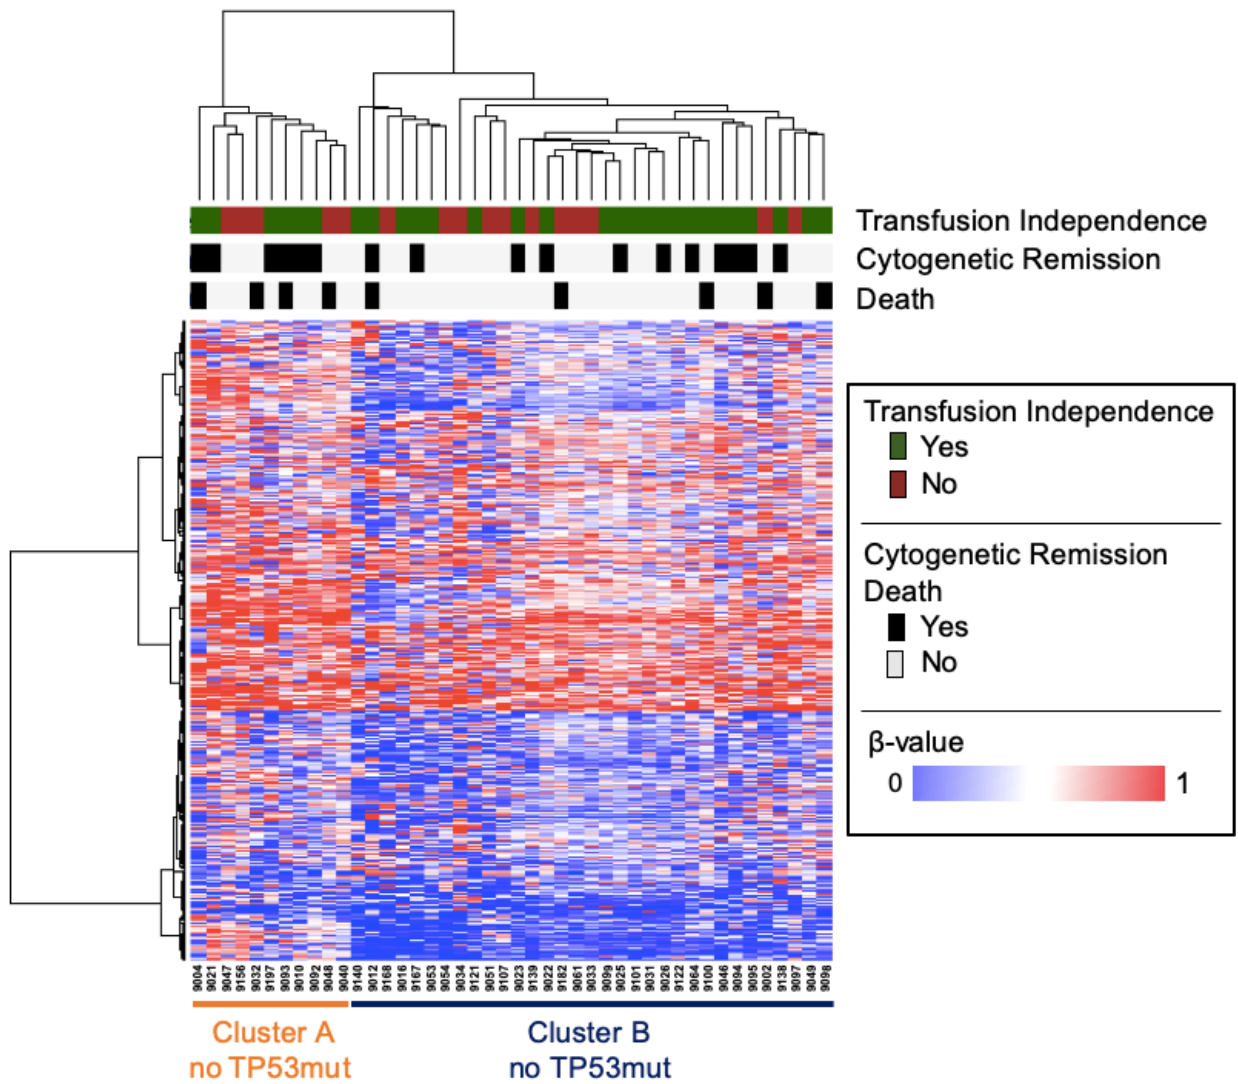

59 **Supplemental Figure 3.** Overall survival of the 44 patients without TP53 mutations was  
60 estimated using the Kaplan-Meier method. Patients are differentiated by Cluster A and  
61 B (compare to Supplemental Figure 2).

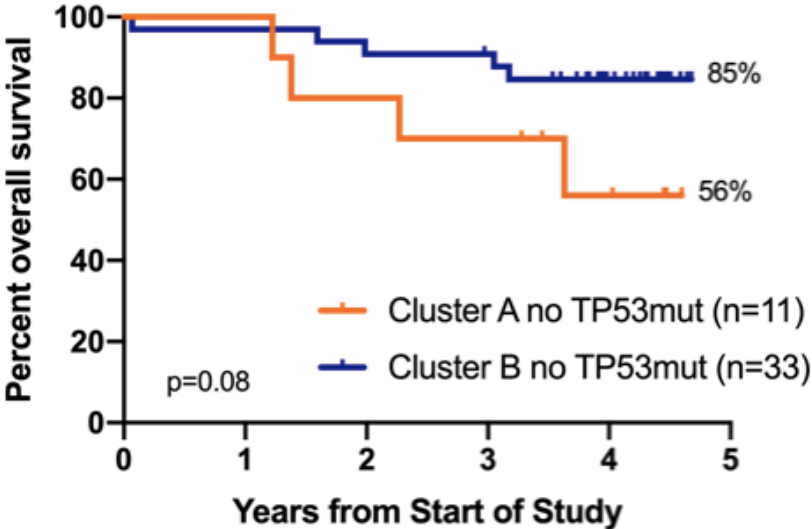

71
